# Supplementary figures and images for: Physicochemical and Antimicrobial Properties of Thermosensitive Chitosan Hydrogel Loaded with Fosfomycin
Source: MDPI journal article supplement (doi:10.3390/md19030144), 2021-03-06

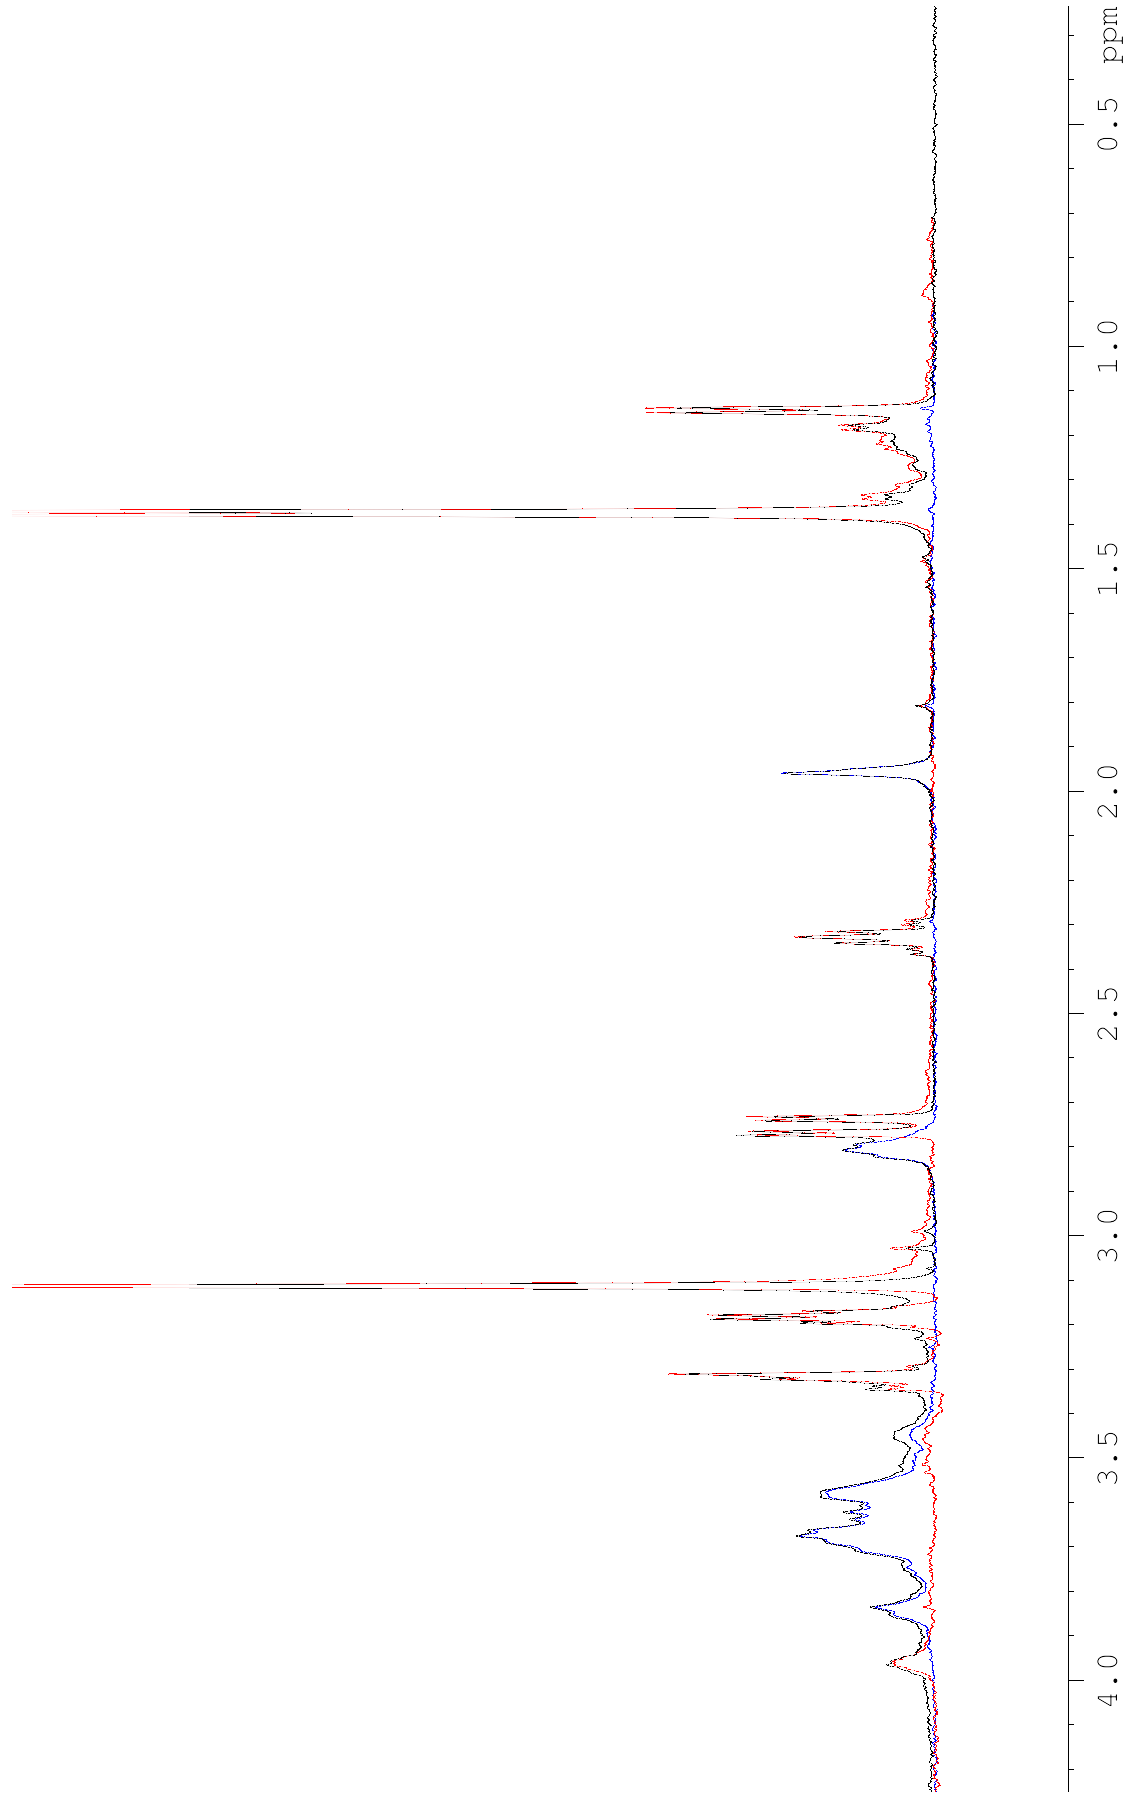

Supplement: s1 [file s1]
